# Supplementary material for: miR-31-mediated local translation at the mitotic spindle is important for early development
Source: Research Square preprint supplement (doi:10.21203/rs.3.rs-3044775/v1), 2023-06-14
Supplement: Supplementary file 1 [file 30cc05564eb9298212bf9d5e.xlsx]

## Sheet: Sheet1
Table S2 RNA pulldown (miR-31 mimic vs. control)
Row.names	SPU_COMMON_NAME	SPU_ID	GENEBANK_HIT	logFC	logCPM	LR	PValue	FDR	S13.cpm	S14.cpm	S15.cpm	S16.cpm	S17.cpm	S18.cpm	S19.cpm	S20.cpm	S21.cpm	S23.cpm	S25.cpm	S26.cpm	S27.cpm	S13.count	S14.count	S15.count	S16.count	S17.count	S18.count	S19.count	S20.count	S21.count	S23.count	S25.count	S26.count	S27.count
WHL22.673644	Sp-Il1r/Rs1(d)	SPU_000409	none	4.97986	2.71518	44.9094	2.06361e-11	4.88869e-07	20.0611	18.0746	0.432912	10.2092	10.9433	0.981916	0.71407	0.145356	22.4813	3.09937	0.720692	0.900662	1.36434	33	178	3	57	90	7	5	1	234	22	6	8	12
WHL22.546681	Sp-Rhop2	SPU_025378	CERAC1H	3.60793	3.57731	38.9727	4.29763e-10	5.09054e-06	51.0645	55.8485	2.16456	20.0602	6.93073	1.54301	0.856885	0.726779	16.5247	1.54968	2.76265	3.60265	5.00257	84	550	15	112	57	11	6	5	172	11	23	32	44
WHL22.434852	Sp-Fscn1	SPU_023199	NP_999701.1	2.1581	9.88795	36.4608	1.55771e-09	1.23007e-05	1828.6	2839.84	291.494	1572.58	1757.61	267.923	193.513	417.317	1717.22	532.95	559.377	464.179	503.327	3008	27967	2020	8780	14455	1910	1355	2871	17874	3783	4657	4123	4427
WHL22.720032	Sp-Il1r/Rs1	SPU_013950	none	4.62981	4.5526	31.373	2.12918e-08	0.000126101	70.5177	51.8883	1.73165	41.0159	46.4481	1.12219	5.56975	0.581423	66.2909	11.1295	8.04773	4.50331	13.7571	116	511	12	229	382	8	39	4	690	79	67	40	121
WHL22.331472	NA	NA	NA	4.9916	1.28995	30.701	3.0101e-08	0.000142618	6.07911	3.65554	0.432912	9.13455	5.47163	0.140274	0	0.145356	3.74688	0.14088	0.600577	1.12583	0.909559	10	36	3	51	45	1	0	1	39	1	5	10	8
WHL22.546687	SPU_016346	NA	NA	3.17481	4.71272	29.4087	5.86142e-08	0.000231428	107.6	64.7842	5.91647	62.509	21.6433	11.2219	9.99699	1.59891	25.5556	17.1874	7.8075	9.7947	14.894	177	638	41	349	178	80	70	11	266	122	65	87	131
WHL22.433537	Sp-Kirrel2L_6	SPU_003193	NP_954649.2	4.25102	2.22067	28.4646	9.54291e-08	0.000322959	16.4136	22.5425	0.577216	9.31366	8.02506	0	0	0.290712	3.74688	0.14088	1.5615	1.80132	0.568474	27	222	4	52	66	0	0	2	39	1	13	16	5
WHL22.434849	Sp-Fscn1	SPU_023199	NP_999701.1	3.19949	6.20995	25.4864	4.4552e-07	0.0013193	126.446	489.537	13.5646	48.3594	140.317	21.3216	4.99849	2.61641	162.365	24.2314	7.92761	12.0464	5.79844	208	4821	94	270	1154	152	35	18	1690	172	66	107	51
WHL22.350265	Sp-Actb_2	SPU_015278	NP_001092.1	4.97421	2.24461	25.0042	5.72047e-07	0.00137239	5.4712	8.83421	0	12.1794	12.2808	0.140274	1.57096	0.290712	9.31916	0.845282	3.00288	4.72848	1.81912	9	87	0	68	101	1	11	2	97	6	25	42	16
WHL22.512518	Sp-Cyld_1	SPU_011766	BAG51293.1	3.01935	5.44767	24.9799	5.79313e-07	0.00137239	74.7731	89.4591	3.17469	57.1357	52.1629	16.5523	19.5655	4.9421	63.793	19.3006	60.6583	42.894	62.8733	123	881	22	319	429	118	137	34	664	137	505	381	553
WHL22.620148	Sp-MeprinAaL	SPU_030013		2.66257	10.8125	23.7076	1.1214e-06	0.00241509	5201.29	6535.39	673.323	2659.05	2445.45	376.355	395.309	189.544	4005.32	565.071	645.74	267.497	1004.27	8556	64361	4666	14846	20112	2683	2768	1304	41690	4011	5376	2376	8833
WHL22.461785	Sp-Abcc10a	SPU_004692	NM_033450	2.76413	3.97292	21.8881	2.89023e-06	0.00570579	43.1617	63.6672	4.18482	22.3886	41.5844	13.4663	2.85628	1.01749	11.3367	2.25408	4.08392	3.60265	7.27647	71	627	29	125	342	96	20	7	118	16	34	32	64
WHL22.80947	SPU_025752	NA	NA	4.81088	0.778443	21.252	4.02689e-06	0.00733824	6.07911	3.04628	0	3.58218	2.67502	0.140274	0.428442	0.145356	4.13117	0.281761	0.360346	0.675497	0.22739	10	30	0	20	22	1	3	1	43	2	3	6	2
WHL22.589997	Sp-Hypp_412	SPU_004329	EDO47093.1	3.88476	1.58909	20.8412	4.98976e-06	0.00738796	2.43164	4.56942	0.72152	11.1047	2.79661	1.12219	1.14251	0.145356	4.13117	1.69056	0.720692	3.71523	2.04651	4	45	5	62	23	8	8	1	43	12	6	33	18
WHL22.20686	SPU_005155	NA	NA	3.52045	3.27591	21.063	4.44438e-06	0.00738796	34.6509	39.1955	1.01013	2.32841	6.32277	2.52493	0.285628	0.290712	23.3459	16.6239	0.480461	4.95364	1.36434	57	386	7	13	52	18	2	2	243	118	4	44	12
WHL22.577814	NA	NA	NA	2.75789	10.3734	20.8548	4.95456e-06	0.00738796	3393.36	4203.56	537.677	2162.2	2219.66	274.516	270.347	104.511	2898.26	419.26	659.553	246.219	920.474	5582	41397	3726	12072	18255	1957	1893	719	30167	2976	5491	2187	8096
WHL22.650386	NA	NA	NA	3.21651	4.76945	20.5044	5.94945e-06	0.0082032	88.1471	94.3331	3.6076	53.1953	11.1864	20.9008	11.1395	2.03498	28.0535	28.5987	4.80461	5.51656	20.9199	145	929	25	297	92	149	78	14	292	203	40	49	184
WHL22.630932	NA	NA	NA	2.45636	4.02572	20.4153	6.23291e-06	0.0082032	50.4566	41.1248	5.48355	29.0156	32.5866	3.36657	4.85568	4.06996	22.9616	9.2981	6.00577	3.9404	10.5736	83	405	38	162	268	24	34	28	239	66	50	35	93
WHL22.620148	Sp-MeprinAaL	SPU_030013		2.40732	10.7632	19.4531	1.03102e-05	0.0117125	4315.56	6628.7	807.958	2503.58	2550.39	403.287	320.475	228.79	3887.53	588.739	626.281	291.027	1000.86	7099	65280	5599	13978	20975	2875	2244	1574	40464	4179	5214	2585	8803
WHL22.433365	Sp-Mvp	SPU_000881	NP_001116989	2.16346	8.35615	19.4397	1.03825e-05	0.0117125	348.941	604.077	113.712	689.211	579.02	96.2278	131.532	103.203	518.606	318.812	303.291	247.007	286.056	574	5949	788	3848	4762	686	921	710	5398	2263	2525	2194	2516
WHL22.433365	Sp-Mvp	SPU_000881	NP_001116989	2.15648	8.36802	19.5099	1.00081e-05	0.0117125	365.355	637.282	113.856	684.912	578.169	96.7889	130.675	103.348	520.047	316.417	303.291	245.881	285.033	601	6276	789	3824	4755	690	915	711	5413	2246	2525	2184	2507
WHL22.620148	Sp-MeprinAaL	SPU_030013		2.73726	10.3296	19.1414	1.21385e-05	0.0119817	3998.84	4507.48	491.932	1725.71	1754.33	265.959	203.653	95.3534	2995.58	422.641	508.088	207.152	691.151	6578	44390	3409	9635	14428	1896	1426	656	31180	3000	4230	1840	6079
WHL22.620148	Sp-MeprinAaL	SPU_030013		2.56685	10.724	19.2533	1.14472e-05	0.0119817	4745.96	6651.35	718.49	2255.7	2159.47	365.974	260.636	169.776	4028.28	551.828	548.807	267.497	839.75	7807	65503	4979	12594	17760	2609	1825	1168	41929	3917	4569	2376	7386
WHL22.620148	Sp-MeprinAaL	SPU_030013		2.50969	10.5428	19.1689	1.19647e-05	0.0119817	3855.37	5617.34	675.92	2139.63	2004.2	331.607	254.923	165.996	3554.44	516.749	528.748	257.252	819.626	6342	55320	4684	11946	16483	2364	1785	1142	36997	3668	4402	2285	7209
WHL22.563609	Sp-Mdh	SPU_003445.1; SPU_012677.1; SPU_021186	NA	-3.43016	1.79906	18.7459	1.49348e-05	0.0141522	3.64747	1.32005	7.50381	0	0.729551	3.08602	2.57065	8.72135	1.05681	2.53585	4.44427	2.81457	2.72868	6	13	52	0	6	22	18	60	11	18	37	25	24
WHL22.350285	Sp-Act_1	SPU_021545	AAA30034.1	2.60352	2.6084	18.3217	1.86569e-05	0.0169993	13.982	10.3573	0.72152	7.34346	4.98526	1.40274	1.85658	2.61641	18.6383	5.49433	4.08392	4.39073	3.06976	23	102	5	41	41	10	13	18	194	39	34	39	27
WHL22.765708	Sp-FtzF	SPU_013843	NA	4.38079	2.05649	17.7784	2.4819e-05	0.0217764	4.25538	6.1941	0.288608	21.6722	0.729551	0.280548	2.14221	0.581423	5.95658	0.422641	1.08104	0.337748	7.73125	7	61	2	121	6	2	15	4	62	3	9	3	68
WHL22.471859	Sp-Hypp_1984	SPU_011507	AAO51215.1	2.92948	5.36266	17.4145	3.0052e-05	0.0245493	119.151	139.012	4.76203	69.6733	14.591	22.4438	18.1374	5.52352	54.3778	56.0704	10.3299	8.78146	33.1989	196	1369	33	389	120	160	127	38	566	398	86	78	292
WHL22.21036	Sp-Nr1m3	SPU_013178		1.92777	6.71419	17.4542	2.94318e-05	0.0245493	219.456	263.3	32.3241	226.394	155.151	20.1994	57.9825	72.6779	172.741	57.62	49.968	20.6027	70.2634	361	2593	224	1264	1276	144	406	500	1798	409	416	183	618
WHL22.765708	Sp-FtzF	NA	NA	4.27472	1.98053	17.2822	3.22192e-05	0.0254424	4.25538	5.4833	0.288608	20.2393	0.729551	0.280548	2.14221	0.581423	5.38013	0.422641	1.08104	0.337748	7.61756	7	54	2	113	6	2	15	4	56	3	9	3	67
WHL22.184359	Sp-CplcaIIb	SPU_009483	47551035	1.48433	10.9011	17.0174	3.70381e-05	0.0283043	6028.66	4275.45	871.452	1875.45	2288.84	1069.45	700.503	819.226	3357.2	1947.25	889.214	1091.27	697.859	9917	42105	6039	10471	18824	7624	4905	5636	34944	13822	7403	9693	6138
WHL22.286588	Sp-Dusp16	SPU_003347	XP_787378.2	1.66907	6.79064	16.9016	3.9369e-05	0.0285104	156.841	240.656	38.6735	190.034	265.435	45.589	41.4161	64.538	140.844	83.8238	79.2761	64.1722	78.5632	258	2370	268	1061	2183	325	290	444	1466	595	660	570	691
WHL22.286588	Sp-Dusp16	NA	NA	1.6343	6.85403	16.8283	4.09182e-05	0.0285104	174.471	271.119	40.2608	190.393	269.204	46.1501	41.7017	68.8987	149.299	85.3735	80.7175	64.8477	77.9947	287	2670	279	1063	2214	329	292	474	1554	606	672	576	686
WHL22.184359	Sp-CplcaIIb	SPU_009483	47551035	1.47735	10.6492	16.8627	4.01846e-05	0.0285104	5261.47	3498.55	723.108	1620.4	1948.39	870.399	607.674	723.291	2723.88	1595.61	733.785	878.258	581.663	8655	34454	5011	9047	16024	6205	4255	4976	28352	11326	6109	7801	5116
WHL22.626091	Sp-Gat_2	SPU_000076	AAF70819.1	2.70953	3.02471	16.6143	4.58048e-05	0.030471	2.43164	1.4216	8.08103	32.0605	50.947	4.76931	3.99879	0.145356	0.960738	0.14088	0.960923	2.13907	2.2739	4	14	56	179	419	34	28	1	10	1	8	19	20
WHL22.620148	Sp-MeprinAaL	SPU_030013		2.70779	10.715	16.5937	4.63046e-05	0.030471	5035.94	6408.86	684.29	2125.66	2225.5	355.594	235.929	104.947	4090.92	541.121	583.52	255.563	785.29	8284	63115	4742	11868	18303	2535	1652	722	42581	3841	4858	2270	6907
WHL22.626091	Sp-Gat_2	SPU_000076	AAF70819.1	2.66506	3.05815	16.5246	4.80238e-05	0.0307482	2.43164	1.72622	8.36963	32.7769	52.4061	4.76931	3.99879	0.145356	0.960738	0.14088	0.960923	2.25166	2.1602	4	17	58	183	431	34	28	1	10	1	8	20	19
WHL22.521303	Sp-Hypp_772	SPU_015150	XP_958002.1	-1.50793	6.41352	15.5771	7.92063e-05	0.0493789	39.5142	68.3382	66.5242	34.0307	25.0479	35.349	71.9783	192.742	60.1422	119.889	130.085	62.0331	141.777	65	673	461	190	206	252	504	1326	626	851	1083	551	1247
