# Supplementary material for: miR-31-mediated local translation at the mitotic spindle is important for early development
Source: Research Square preprint supplement (doi:10.21203/rs.3.rs-3044775/v1), 2023-06-14
Supplement: Supplementary file 2 [file e0ab92bc8b17002457629a49.xlsx]

## Sheet: iTRAQ proteomics
Accession	Protein name	The difference of the means between control and treated samples in log2
		1-C1	1-C2	2-C3	2-C4	Overall	1-C1 Norm	1-C2 Norm	2-C3 Norm	2-C4 Norm	Overall Norm	fold difference
Positive significance (Control < Treated sample)
XP_001179300.1	PREDICTED: similar to cyclophilin	0.85789	7.04084	0.60576	0.44883	2.3607	1.6844	3.2822	0.37834	0.4662	2.226	4.67835
XP_001179181.1	PREDICTED: similar to tubulin, alpha 2 isoform 2	1.20709	0.94804	1.42809	1.14138	1.207	1.0655	0.7868	1.09467	1.2991	1.1167	2.1685
XP_001177415.1	PREDICTED: similar to HLC-32	1.12367	1.01026	0.58011	0.22702	0.7334	0.6177	0.6593	0.05164	0.6181	0.6121	1.52848
XP_791790.1	PREDICTED: tubulin B-chain	0.26419	0.24194	0.95995	0.99204	0.3781	-0.0388	0.2526	0.95085	0.839	0.2228	1.167
XP_780390.1	PREDICTED: similar to putative ribosomal protein S14e	1.64081	0.85293	1.56261	1.17499	1.1178	0.5331	1.1401	0.69636	1.8576	1.0563	2.07959
XP_001176123.1	PREDICTED: similar to gelsolin	0.12817	0.93202	1.04144	1.03182	0.5941	0.1602	0.6231	0.97974	0.9414	0.4566	1.3723
XP_791430.1	PREDICTED: similar to Histone H2AV (H2A.F/Z)			0.42916	0.47841	0.4982			0.76688	0.0515	0.4345	1.35144
XP_001178269.1	PREDICTED: similar to EBP-alpha	0.61654	1.18848	0.0679	0.33736	0.8602	0.7817	0.7521	-0.04733	0.2949	0.7014	1.62608
XP_791056.2	PREDICTED: hypothetical protein, partial	0.96764	1.0313		0.68539	0.8327	0.7258	0.85		0.5999	0.6658	1.58645
XP_001189622.1	PREDICTED: similar to Acyl-Coenzyme A dehydrogenase, long chain	1.38256	1.88947	1.08136	0.79184	1.0553	1.23866	1.639	0.93389	0.8296	0.9757	1.9666
XP_001181395.1	PREDICTED: similar to arginine kinase	0.24671	-0.04738	1.39583	1.53339	1.1001	-0.0691	-0.1675	1.23804	1.5729	0.9914	1.98811
XP_001177431.1	PREDICTED: similar to tubulin, alpha 2 isoform 2			2.18564	0.94679	1.3553			1.69653	1.1493	1.2917	2.44816
NP_999721.1	histone H2b-2	0.1256	0.10689	0.91833	0.94249	0.4955	-0.1317	0.0865	0.96792	0.812	0.3774	1.299
XP_781777.1	PREDICTED: similar to Ribosomal protein S2		-0.08421	0.7209	0.60374	0.4722		-0.3347	0.549	0.5613	0.3708	1.29307
XP_794336.1	PREDICTED: similar to creatine kinase, mitochondrial	0.99969	0.87146	0.19089	0.09658	0.633	0.7842	0.7945	0.03729	0.0541	0.4922	1.40659
XP_801793.1	PREDICTED: similar to ATP synthase, H+ transporting			1.3768	1.08626	1.0938			1.03423	1.0438	1.0332	2.04656
XP_001190124.1	PREDICTED: hypothetical protein	-0.72642		1.70184	0.810073	1.0378	-0.8703		1.43604	0.7246	0.8325	1.78077
XP_788276.1	PREDICTED: similar to HS1 (14, 3,3 protein)	0.9748	0.8603	0.4295	0.416	0.5882	0.8122	0.6921	0.31433	0.3735	0.497	1.41128
XP_001178596.1	PREDICTED: similar to apolipophorin precursor protein	1.92563	0.95356			1.4582	1.8115	0.7233			1.2677	2.40777
XP_782717.2	PREDICTED: similar to chaperonin containing TCP1, subunit 6A isoform 2			1.53159	0.40775	0.9697			1.32035	0.4822	0.9013	1.86775
NP_999808.1	heat shock protein gp96	1.56329	0.42086	0.34337	0.31604	0.4291	1.4194	0.1704	0.0634	0.4641	0.3496	1.27421
NP_999714.1	early histone H1	1.5066	1.3922			1.4494	1.344	1.2239			1.284	2.43513
XP_781507.1	PREDICTED: similar to ribosomal protein L12, partial	2.41172	0.685357			1.5485	2.2678	0.4349			1.3514	2.5516
XP_001188952.1	PREDICTED: similar to PRO1633, partial chapertone containing TCP1			0.29817	0.38034	0.3142			0.16715	0.397	0.2573	1.19524
NP_999743.1	mitochondrial ATP synthase alpha subunit precursor	0.18508	0.2063	0.38663	0.19452	0.2049	-0.0744	0.1524	0.0997	0.2938	0.0864	1.06172
XP_780172.1	PREDICTED: similar to adenosylhomocysteinase	0.26496	0.08785	0.3512	0.17396	0.1984	-0.0951	0.1715	0.12443	0.2271	0.0857	1.0612
XP_001176458.1	PREDICTED: similar to elongation factor 1 alpha isoform 1	0.12807	0.11465	0.34294	0.2857	0.2362	-0.0643	0.0291	0.3115	0.2024	0.1203	1.08696
XP_001194483.1	PREDICTED: hypothetical protein, partial			1.13052	0.94677	0.9693			1.5965	0.2038	0.8858	1.84779
XP_782254.2	PREDICTED: similar to RACK	0.60941	0.02923	0.03424	0.05239	0.1331	0.2395	0.104	-0.10022	0.0802	0.0245	1.01713
XP_795649.2	PREDICTED: similar to D-3-phosphoglycerate dehydrogenase	0.37412	0.21442	0.00593	0.00727	0.1275	-0.1526	0.3857	-0.04009	-0.037	0.0206	1.01438
NP_999692.1	cytoskeletal actin CyIIIb	0.73608	-0.5056			-0.338	0.3893	-0.4454			-0.5512	0.682452
XP_001188929.1	PREDICTED: similar to malate dehydrogenase	1.16922				1.16922	1.02532				1.0253	2.03538
XP_001187263.1	PREDICTED: similar to glutathione reductase	1.15264	1.02141			1.08702	1.00874	0.7709			0.8898	1.85292
XP_783473.1	PREDICTED: hypothetical protein	-0.20518	0.37854	0.0212	0.74913	0.07924	-0.2997	0.1634	-0.14771	0.8666	-0.0588	0.960062
XP_001190324.1	PREDICTED: hypothetical protein	-0.79613	-0.94344	0.34468	0.50623	-0.034	-1.342	-0.7991	0.18425	0.5514	-0.1255	0.916686
XP_788858.1	PREDICTED: similar to MGC68486 protein, partial	-0.34428	0.25403	1.84244	-0.91221	-0.0061	-0.5502	0.137	1.45729	-0.9546	-0.141	0.90689
XP_783293.1	PREDICTED: similar to H(+)-transporting ATPase beta subunit	0.27545	0.25537	0.03938	0.05856	0.1177	0.0882	0.1333	-0.05861	0.0223	0.014	1.00975
XP_780116.2	PREDICTED: similar to glyceraldehydephosphate dehydrogenase isoform 1	0.15295	0.03396	0.37632	0.06911	0.091	-0.0251	-0.0815	-0.072	0.2081	-0.034	0.976709
XP_001196788.1	PREDICTED: similar to glutamine synthetase	-0.44622	-0.38955	1.29424	0.55153	0.0732	-0.9995	-0.1267	0.65718	0.9058	-0.0418	0.971442
XP_797562.1	PREDICTED: similar to ENSANGP00000011796			0.59463	0.57947	0.5871			0.52748	0.537	0.5323	1.44623
XP_001177774.1	PREDICTED: similar to RAB35, member RAS oncogene family	1.79111	2.1166			1.95385	1.6472	1.8661			1.7567	3.37924
XP_783048.1	PREDICTED: similar to Slc25a3-prov protein	0.91862	1.33714			1.12788	0.774717	1.0867			0.9307	1.9062
XP_001177664.1	PREDICTED: similar to Peptidase (mitochondrial processing) beta isoform 1	1.05832	0.443925			0.75112	0.914419	0.1935			0.5539	1.46805
XP_001184576.1	PREDICTED: similar to Grp58-prov protein	-0.0258	1.24516	0.3022	-0.48681	0.2103	-0.3102	1.1566	0.10117	-0.5034	0.0747	1.05314
XP_001176440.1	PREDICTED: similar to thioredoxin peroxidase	0.2832	0.53385	0.53595	0.58791	0.4616	0.2599	0.2151	0.70505	0.2865	0.3325	1.25919
XP_784254.1	PREDICTED: similar to Ribosomal protein S11	0.33558	0.2211			0.2783	0.173	0.0529			0.1129	1.0814
XP_001191897.1	PREDICTED: similar to hyalin			0.87578		0.87578			0.50086		0.5009	1.4151
XP_780884.1	PREDICTED: similar to H4 histone protein			0.30806	0.40289	0.3617			1.06933	-0.3459	0.2957	1.22748
Annotation:	1-C1: S1/C1&S2/C1 Vs C1/C1&C2/C1
	1-C2: S1/C2& S2/C2 Vs C1/C2&C2/C2
	2-C3: S3/C3&S4/C3 Vs C3/C3& C4/C3
	2-C4: S3/C4&S4/C4 Vs C3/C4& C4/C4
	Overall: S1/C1&S2/C1&S1/C2&S2/C2&S3/C4& S4/C4&S3/C3&S4/C3 Vs C1/C1&C2/C1&C1/C2&C2/C2 &C3/C3&C4/C3&C3/C4& C4/C4
	Positive significance (Control < Treated sample)
